# Supplementary material for: Mapping Polycomb Response Elements at the Drosophila melanogaster giant Locus
Source: Oxford University Press journal article supplement (doi:10.1534/g3.113.008896), 2013-10-31
Supplement: 008896_tables1.pdf [file 008896_tables1.pdf]

**Table S1 Cloning primers**

| Primer | Sequence                                                                  |
|--------|---------------------------------------------------------------------------|
| gt1-U  | 5'- GCGCATGTGAAGTTCCTATACTTTCTAGAGAATAGGAACTTCTGCTGGTACTGGTGGTGGTG -3'    |
| gt1-L  | 5'- GCGCATGTGAAGTTCCTATTCTCTAGAAAAGTATAGGAACTTCGAATGGGCAGTTGTAAAAAGAG -3' |
| gt2-U  | 5'- GGGACATGTGAAGTTCCTATACTTTCTAGAGAATAGGAACTTCTCGCATCCTTTTCTTATTTTCG -3' |
| gt2-L  | 5'- GGGACATGTGAAGTTCCTATTCTCTAGAAAAGTATAGGAACTTCTACCTGTTCCATTATCCTCTG -3' |
| gt3-U  | 5'- GCCACATGTGAAGTTCCTATACTTTCTAGAGAATAGGAACTTCAGCGAAAAAGACTAACCAGGA -3'  |
| gt3-L  | 5'- GCCACATGTGAAGTTCCTATTCTCTAGAAAAGTATAGGAACTTCGCAGTGTAGCCGTAGGAGCA -3'  |
| gt4-U  | 5'- GCCACATGTGAAGTTCCTATACTTTCTAGAGAATAGGAACTTCCATTGTTTTGATGAACTGTCA -3'  |
| gt4-L  | 5'- GCCACATGTGAAGTTCCTATTCTCTAGAAAAGTATAGGAACTTCATGCCCCGATGCTGTCT -3'     |
| gt5-U  | 5'- CGCACATGTGAAGTTCCTATACTTTCTAGAGAATAGGAACTTCGCACGCAGTTTTGTAGGTGG -3'   |
| gt5-L  | 5'- CGCACATGTGAAGTTCCTATTCTCTAGAAAAGTATATAGGAACTTCGCGGTCTCAGTTCTCAGTC -3' |
