# Supplementary material for: Mapping Polycomb Response Elements at the Drosophila melanogaster giant Locus
Source: Oxford University Press journal article supplement (doi:10.1534/g3.113.008896), 2013-10-31
Supplement: 008896_tables2.pdf [file 008896_tables2.pdf]

**Table S2 Primers used for ChIP**

| Primer | Sequence                                  | Length of amplicon | Coordinate from TSS |
|--------|-------------------------------------------|--------------------|---------------------|
| 1      | 5'- TCCGTTTTTCTGCGCTTGTAG -3'             | 214                | +4048               |
|        | 5'- GGATCTGAATATGAATGTGGAGGTT -3          |                    | +3834               |
| 2      | 5' TGAAATTCATTCTTAGGGCTAT -3'             | 218                | +1834               |
|        | 5' AGGGGGCTCAACTTTCTTTT -3'               |                    | +1616               |
| 4      | 5' AACGCAAAGTATTTCTCTCG -3'               | 177                | +9                  |
|        | 5' CAGAAGCAAAGCCAGAATCACC 3'              |                    | -168                |
| 5      | 5'- TTCCGCGAAAGGATATGGTT -3'              | 239                | -368                |
|        | 5'- AAATCAAATGCACAATGCTGGT -3'            |                    | -607                |
| 6      | 5' -CGT ATA GCC CAG CCC AATC -3'          | 182                | -1839               |
|        | 5' -GCT CAT TAT GGC GAA GGA ACA -3'       |                    | -2021               |
| 7      | 5' -CTG ACC AGC CAA GCG AAA AG-3'         | 240                | -3422               |
|        | 5' - GGC CGG TGC AAA CTT AAG ATA G - 3'   |                    | -3662               |
| 9      | 5' -CCG GGC CAT GCA ATA AAG TA -3'        | 212                | -6108               |
|        | 5' -CGC TTC CTC CAA CTC CCT ATA TTC-3'    |                    | -6320               |
| 10     | 5' -ATA TGC CAC GCC ATC TTA GCA C -3'     | 258                | -7378               |
|        | 5' -CCT CAG TTC TCA GTC CGC TTC TAA T -3' |                    | -7636               |
| 13     | 5'- CCAAATGCCACACACAACACA -3'             | 233                | -14263              |
|        | 5'- GCCAGTTTCACATGCACATCAA -3'            |                    | -14496              |
